# Supplementary material for: FUT8 promotes breast cancer cell invasiveness by remodeling TGF-β receptor core fucosylation
Source: Springer Nature journal article supplement (doi:10.1186/s13058-017-0904-8), 2017-10-05
Supplement: MOESM1 [file 15111654]

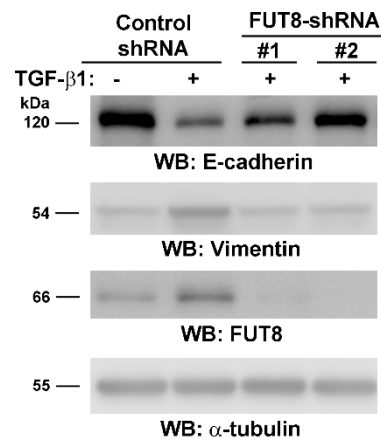

**Figure S1.** FUT8 knockdown impaired the EMT in NMuMG cells. Control or FUT8-knockdown NMuMG cells were treated with TGF- $\beta$ 1 (5 ng/ml) for 2 days. The effect of FUT8 knockdown on the EMT was examined by measuring E-cadherin and vimentin expression by western blot analysis as previously described.
